# Supplementary material
Source: PubMed Central journal article supplement (PMC8863626)
Supplement: NIHMS1747144-supplement-1.pdf [file NIHMS1747144-supplement-1.pdf]

**Appendix**  
**Protective Factors for Nicotine and Marijuana Vaping Among U.S. Adolescents**  
**Parks and Patrick**

**Appendix Table 1.** Weighted Descriptive Statistics for Individual Assets in the Monitoring the Future Sample, 2017–2019

| <b>Variables</b>                  | <b>% (SE)</b> |
|-----------------------------------|---------------|
| Social competency/decision making | 39.6 (0.83)   |
| Life satisfaction                 | 50.5 (0.84)   |
| Sense of self/self-esteem         | 51.9 (1.05)   |
| Commitment to learning            | 13.3 (0.61)   |
| Positive values                   | 53.2 (0.89)   |
| Safety                            | 63.6 (1.30)   |
| Positive peer norms               | 73.1 (0.98)   |
| Family support                    | 69.9 (0.74)   |
| Neighborhood support              | 65.0 (0.99)   |

*Notes:* Unweighted N=6,982. Weights were used to generate estimates, which account for the complex survey design of the Monitoring the Future study; multiple imputation was used for missing data.

**Appendix**  
**Protective Factors for Nicotine and Marijuana Vaping Among U.S. Adolescents**  
**Parks and Patrick**

**Appendix Table 2.** Weighted Logistic Regression Results for Current Nicotine and Marijuana Vaping among U.S. 12th Graders (Baseline Years 2017–2019)

| <b>Variables</b>                  | <b>Nicotine vaping<br/>AOR (95% CI)</b> | <b>Marijuana vaping<br/>AOR (95% CI)</b> |
|-----------------------------------|-----------------------------------------|------------------------------------------|
| Social competency/decision making | <b>0.25</b> (0.18, 0.34)                | <b>0.04</b> (0.02, 0.12)                 |
| Life satisfaction                 | 1.06 (0.84, 1.33)                       | 1.17 (0.88, 1.55)                        |
| Sense of self/self-esteem         | 1.01 (0.81, 1.26)                       | 1.03 (0.79, 1.34)                        |
| Commitment to learning            | 0.91 (0.63, 1.30)                       | 0.71 (0.44, 1.14)                        |
| Positive values                   | 1.00 (0.82, 1.24)                       | 0.86 (0.68, 1.09)                        |
| Safety                            | 1.23 (0.96, 1.57)                       | 0.93 (0.69, 1.26)                        |
| Positive peer norms               | <b>0.34</b> (0.28, 0.42)                | <b>0.27</b> (0.21, 0.36)                 |
| Family support                    | 0.84 (0.68, 1.05)                       | 0.88 (0.65, 1.18)                        |
| Neighborhood support              | 1.23 (0.98, 1.55)                       | 1.01 (0.72, 1.43)                        |

*Notes:* Unweighted N=6,982. Bolded ORs indicate statistical significance ( $p<0.05$ ). Models control for demographics and substance use included in Model 2 of main analyses.
